# Supplementary material
Source: PubMed Central journal article supplement (PMC7719081)
Supplement: NIHMS1605495-supplement-Supporting_information.pdf [file NIHMS1605495-supplement-Supporting_information.pdf]

# Supporting Materials for Persistent spectral graph

Rui Wang<sup>1</sup>, Duc Duy Nguyen<sup>1</sup>, and Guo-Wei Wei<sup>1,2,3 \*</sup>

<sup>1</sup> Department of Mathematics, Michigan State University, MI 48824, USA

<sup>2</sup> Department of Biochemistry and Molecular Biology  
Michigan State University, MI 48824, USA

<sup>3</sup> Department of Electrical and Computer Engineering  
Michigan State University, MI 48824, USA

---

\* Address correspondences to Guo-Wei Wei. E-mail:wei@math.msu.edu

# Contents

|           |                                                                                           |          |
|-----------|-------------------------------------------------------------------------------------------|----------|
| <b>S1</b> | <b>Proprieties of the spectra of Laplacian</b>                                            | <b>1</b> |
| <b>S2</b> | <b>Examples of betti numbers of simplicial complexes</b>                                  | <b>2</b> |
| <b>S3</b> | <b>The connection between Betti number and the dimension of the rank of the Laplacian</b> | <b>2</b> |
| <b>S4</b> | <b>Persistence Homology</b>                                                               | <b>4</b> |
| S4.1      | Homology . . . . .                                                                        | 4        |
| S4.2      | Persistent homology . . . . .                                                             | 5        |
| <b>S5</b> | <b>Implement PST to distinguish different topological structures</b>                      | <b>5</b> |
| <b>S6</b> | <b>Additional Laplacian matrices and their properties</b>                                 | <b>7</b> |

# S1 Proprieties of the spectra of Laplacian

**Property S1.1.** Let  $G(V, E)$  be a simple graph of order  $N$ , then the largest eigenvalue

$$\lambda_N \leq \max\{\deg(u) + \deg(v) | (u, v) \in E\}, \tag{S1.1}$$

where  $\deg(u)$  is the degree of vertex  $u \in V$ .

**Property S1.2.** Let  $G(V, E)$  be a simple graph of order  $N$  rather than a complete graph with vertex connectivity  $\kappa(G)$  and edge connectivity  $\kappa'(G)$ . Then

$$2\kappa'(G)(1 - \cos(\pi/N)) \leq \lambda_2(G) \leq \kappa(G) \leq \kappa'(G). \tag{S1.2}$$

The vertex connectivity  $\kappa(G)$  is the minimum number of nodes whose deletion disconnects  $G$  and edge connectivity  $\kappa'(G)$  to be the minimum number of edges whose deletion from a graph  $G$  disconnects  $G$ .

The charts in the top row of Figure 1 show 5 different types of regular convex polyhedrons, which are called platonic solids. The charts in the bottom row are platonic graphs that intuitively describe the vertices and edges as points and line segments in the Euclidean plane. In the three-dimensional (3D) space, objects (vertices) and the relationship (edges) between objects can be expressed by the Laplacian matrix and vice versa. Taking tetrahedron as an example, we denote the top vertex as  $v_1$ , while the other 3 vertices on the plane are denoted as  $v_2, v_3$ , and  $v_4$ . The Laplacian matrix of the tetrahedron can be expressed as:

$$\mathcal{L}_{\text{Tetra}} = \begin{bmatrix} 3 & -1 & -1 & -1 \\ -1 & 3 & -1 & -1 \\ -1 & -1 & 3 & -1 \\ -1 & -1 & -1 & 3 \end{bmatrix}$$

with eigenvalues being  $\lambda_1 = 0, \lambda_2 = 4, \lambda_3 = 4$ , and  $\lambda_4 = 4$ . Topological information can be extracted from this Laplacian matrix. First, the multiplicity of 0 eigenvalue is 1, which means there is only one connected component. Secondly, all of the entries in  $\mathcal{L}_{\text{Tetra}}$  are non-zero and all the entries in the diagonal equal to 3, which means the corresponding graph is a complete 3-regular graph. Moreover, as stated by Properties S1.1 and S1.2, the largest eigenvalue  $\lambda_4 \leq \max\{\deg(u) + \deg(v) | (u, v) \in E\} = 6$ . The second smallest eigenvalue  $\lambda_2$  is controlled by  $\kappa(G) = 4$  and greater than  $2\kappa'(G)(1 - \cos(\pi/N)) = 2 \times 3 \times (1 - \cos(\pi/4)) \approx 1.75735931288$ . A similar analysis can be applied to other 4 platonic solids. Table 1 shows some characteristics of platonic solids.

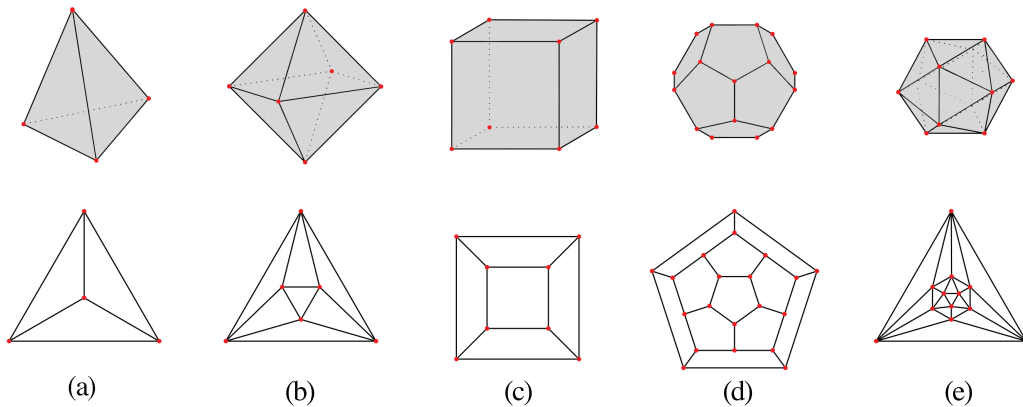

Figure 1: Platonic solids (top row) and its platonic graphs (bottom row). (a) Tetrahedron and tetrahedral graph. (b) Octahedron and octahedral graph. (c) Cube and cubical graph. (d) Dodecahedron and dodecahedral graph. (e) Icosahedron and icosahedral graph.

Table 1: Characteristics of platonic solids in Figure 1.  $V, E, \beta_0, \kappa, \kappa', d,$  and  $\tilde{\lambda}_2$  stand for the number of vertices, the number of edges, the number of zero eigenvalues, vertex connectivity, edge connectivity, and the smallest non-zero eigenvalue, respectively. Here, all the platonic graphs are connected simple graphs, so  $\lambda_2 = \tilde{\lambda}_2$ .

| Platonic Solid | $V$ | $E$ | $\kappa$ | $\kappa'$ | $\beta_0$ | $\tilde{\lambda}_2$ |
|----------------|-----|-----|----------|-----------|-----------|---------------------|
| Tetrahedron    | 4   | 6   | 4        | 3         | 1         | 4.00                |
| Octahedron     | 6   | 12  | 4        | 4         | 1         | 4.00                |
| Cube           | 8   | 12  | 3        | 3         | 1         | 2.00                |
| Dodecahedron   | 20  | 30  | 3        | 3         | 1         | 0.7639              |
| Icosahedron    | 12  | 30  | 5        | 5         | 1         | 2.76                |

## S2 Examples of betti numbers of simplicial complexes

(A supplemental example for Section 2.2.) To illustrate the simplicial complex and its corresponding Betti number, we have designed two simple models as is shown in Figure 2. The Betti number of simplicial complexes are listed in Table 2.<sup>1</sup>

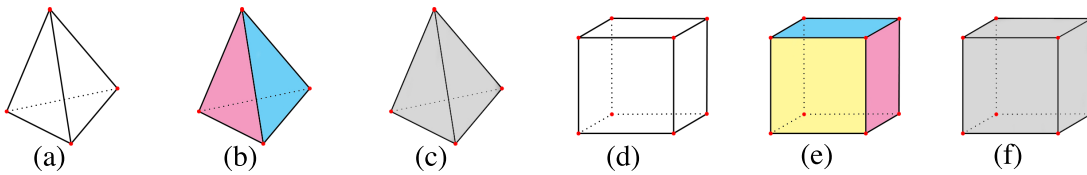

Figure 2: Illustrations of simplicial complexes

Table 2: The Betti number of simplicial complexes in Figure 2. Each color represents different faces. The tetrahedron-shaped simplicial complexes are demonstrated in (a)-(c), and the cube-shaped simplicial complexes are depicted in (d) - (f). (a) and (d) only has 0-simplices and 1-simplices, (b) has four 2-simplices, and (c) has one more 3-simplex. (e) and (f) do not have any 2-simplex.

| Betti number | Fig. 3 (a) | Fig. 3 (b) | Fig. 3 (c) | Fig. 3 (d) | Fig. 3 (e) | Fig. 3 (f) |
|--------------|------------|------------|------------|------------|------------|------------|
| $\beta_0$    | 1          | 1          | 1          | 1          | 1          | 1          |
| $\beta_1$    | 3          | 0          | 0          | 5          | 0          | 0          |
| $\beta_2$    | 0          | 1          | 0          | 0          | 1          | 0          |

## S3 The connection between Betti number and the dimension of the rank of the Laplacian

(A supplemental example for Section 2.3.2.) To illustrate the connection between Betti number and the dimension of the rank of  $q$ -combinatorial Laplacian matrix, we consider the tetrahedron-shaped structures in Figure 3. For the sake of brevity, we will use  $i$  to represents 0-simplex  $[v_i]$ ,  $ij$  to represents 1-simplex  $[v_i, v_j]$ , and  $ijk$  to represents  $[v_i, v_j, v_k]$ . Then, 1- and 2-boundary operators map:

$$\begin{aligned}\partial_1(ij) &= j - i, \\ \partial_2(ijk) &= jk - ik + ij.\end{aligned}$$

Since different orientations result in the same spectrum, there is no need to label the orientation in Figure 3. In the following, we analyze three tetrahedron-shaped simplicial complexes:

<sup>1</sup>These examples show in an intuitive way to count Betti numbers. However, In Section 2.3, it is impossible to generate structures (b), (e), and (f).

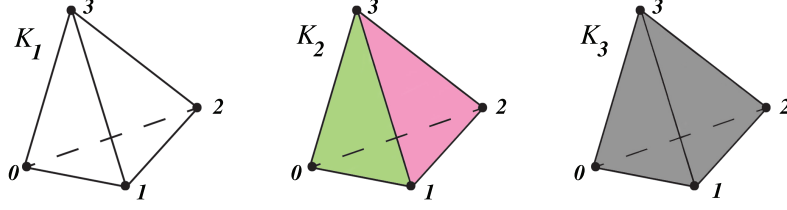

Figure 3: Illustration of three different tetrahedron-shaped simplicial complexes. There are four 0-simplices and six 1-simplices in  $K_1$ . Here,  $K_2$  has four more 2-simplices than  $K_1$  does, while  $K_3$  owns one more 3-simplex than  $K_2$  does.

$K_1$ . The left most chart in Figure 3 has four 0-simplices: 0, 1, 2, and 3, and six 1-simplices: 01, 02, 03, 12, 13, and 23. It is clear that  $C_q(K_1)$  is an empty set and  $\partial_q$  is a zero map when  $q \geq 2$ . Then, its Laplacian operators are

$$\Delta_1 = \partial_1^* \partial_1, \quad \Delta_0 = \partial_1 \partial_1^* + \partial_0^* \partial_0.$$

The combinatorial Laplacian matrices are:

$$\mathcal{L}_1 = \mathcal{B}_1^T \mathcal{B}_1, \quad \mathcal{L}_0 = \mathcal{B}_1 \mathcal{B}_1^T + \mathcal{B}_0^T \mathcal{B}_0.$$

The matrix representation  $\mathcal{B}_1$  for  $\partial_1 : C_1(K_1) \rightarrow C_0(K_1)$  is:

$$\mathcal{B}_1 = \begin{matrix} & \begin{matrix} 01 & 02 & 03 & 12 & 13 & 23 \end{matrix} \\ \begin{matrix} 0 \\ 1 \\ 2 \\ 3 \end{matrix} & \begin{bmatrix} -1 & -1 & -1 & 0 & 0 & 0 \\ 1 & 0 & 0 & -1 & -1 & 0 \\ 0 & 1 & 0 & 1 & 0 & -1 \\ 0 & 0 & 1 & 0 & 1 & 1 \end{bmatrix} \end{matrix}. \quad (\text{S3.1})$$

and  $\mathcal{B}_0$  is

$$\mathcal{B}_0 = \begin{bmatrix} 0 & 1 & 2 & 3 \\ 0 & 0 & 0 & 0 \end{bmatrix}$$

Therefore, the associated combinatorial Laplacian matrices are

$$\mathcal{L}_1(K_1) = \begin{bmatrix} 2 & 1 & 1 & -1 & -1 & 0 \\ 1 & 2 & 1 & 1 & 0 & -1 \\ 1 & 1 & 2 & 0 & 1 & 1 \\ -1 & 1 & 0 & 2 & 1 & -1 \\ -1 & 0 & 1 & 1 & 2 & 1 \\ 0 & -1 & 1 & -1 & 1 & 2 \end{bmatrix}, \quad \mathcal{L}_0(K_1) = \begin{bmatrix} 3 & -1 & -1 & -1 \\ -1 & 3 & -1 & -1 \\ -1 & -1 & 3 & -1 \\ -1 & -1 & -1 & 3 \end{bmatrix}.$$

As shown in Table 3, we can calculate the spectra and ranks from combinatorial Laplacian matrices. We have  $\beta_0 = 1$ ,  $\beta_1 = 3$ , which reveal that one connected component and three 1-cycles are exist in  $K_1$ .

Table 3: Table of dimensions, ranks, nullity, spectra and Betti numbers of combinatorial Laplacian matrices  $\mathcal{L}_0$ , and  $\mathcal{L}_1$  for simplicial complex  $K_1$ .

|              | $\mathcal{L}_1(K_1)$   | $\mathcal{L}_0(K_1)$ |
|--------------|------------------------|----------------------|
| Betti number | $\beta_1 = 3$          | $\beta_0 = 1$        |
| dim          | 6                      | 4                    |
| rank         | 3                      | 3                    |
| nullity      | 3                      | 1                    |
| Spectra      | $\{0, 0, 0, 4, 4, 4\}$ | $\{0, 4, 4, 4\}$     |

$K_2$ . We analyze the middle chart in Figure 3 in a similar manner. As one can see,  $K_2$  has four 0-simplices: 0, 1, 2, and 3, six 1-simplices: 01, 02, 03, 12, 13, and 23, and four 2-simplices: 012, 013, 023, and 123. The associated Laplacian operators are

$$\Delta_2 = \partial_2^* \partial_2, \quad \Delta_1 = \partial_2 \partial_2^* + \partial_1^* \partial_1, \quad \Delta_0 = \partial_1 \partial_1^* + \partial_0^* \partial_0.$$

The resulting combinatorial Laplacian matrices are

$$\mathcal{L}_2 = \mathcal{B}_2^T \mathcal{B}_2, \quad \mathcal{L}_1 = \mathcal{B}_2 \mathcal{B}_2^T + \mathcal{B}_1^T \mathcal{B}_1, \quad \mathcal{L}_0 = \mathcal{B}_1 \mathcal{B}_1^T + \mathcal{B}_0^T \mathcal{B}_0.$$

The corresponding matrix representations for  $\mathcal{B}_2$  and  $\mathcal{B}_1$  are respectively

$$\mathcal{B}_2 = \begin{array}{c} 012 \quad 013 \quad 023 \quad 123 \\ \begin{array}{l} 01 \\ 02 \\ 03 \\ 12 \\ 13 \\ 23 \end{array} \begin{bmatrix} 1 & 1 & 0 & 0 \\ -1 & 0 & 1 & 0 \\ 0 & -1 & -1 & 0 \\ 1 & 0 & 0 & 1 \\ 0 & 1 & 0 & -1 \\ 0 & 0 & 1 & 1 \end{bmatrix}, \end{array} \quad \mathcal{B}_1 = \begin{array}{c} 01 \quad 02 \quad 03 \quad 12 \quad 13 \quad 23 \\ \begin{array}{l} 0 \\ 1 \\ 2 \\ 3 \end{array} \begin{bmatrix} -1 & -1 & -1 & 0 & 0 & 0 \\ 1 & 0 & 0 & -1 & -1 & 0 \\ 0 & 1 & 0 & 1 & 0 & -1 \\ 0 & 0 & 1 & 0 & 1 & 1 \end{bmatrix}. \end{array} \quad (\text{S3.2})$$

Then, associated combinatorial Laplacian matrices are

$$\mathcal{L}_2(K_2) = \begin{bmatrix} 3 & 1 & -1 & 1 \\ 1 & 3 & 1 & -1 \\ -1 & 1 & 3 & 1 \\ 1 & -1 & 1 & 3 \end{bmatrix}, \quad \mathcal{L}_1(K_2) = \begin{bmatrix} 4 & 0 & 0 & 0 & 0 & 0 \\ 0 & 4 & 0 & 0 & 0 & 0 \\ 0 & 0 & 4 & 0 & 0 & 0 \\ 0 & 0 & 0 & 4 & 0 & 0 \\ 0 & 0 & 0 & 0 & 4 & 0 \\ 0 & 0 & 0 & 0 & 0 & 4 \end{bmatrix},$$

and  $\mathcal{L}_0(K_2) = \mathcal{L}_0(K_1)$ . Similarly, from Table 4, we see that there are one connected component and one 2-cycle (void) in  $K_2$ .

Table 4: Table of dimensions, ranks, nullity, spectra and Betti numbers of combinatorial Laplacian matrices  $\mathcal{L}_0, \mathcal{L}_1$ , and  $\mathcal{L}_2$  for simplicial complex  $K_2$ .

|              | $\mathcal{L}_2(K_2)$ | $\mathcal{L}_1(K_2)$   | $\mathcal{L}_0(K_2)$ |
|--------------|----------------------|------------------------|----------------------|
| Betti number | $\beta_2 = 1$        | $\beta_1 = 0$          | $\beta_0 = 1$        |
| dim          | 4                    | 6                      | 4                    |
| rank         | 3                    | 6                      | 3                    |
| nullity      | 1                    | 0                      | 1                    |
| Spectra      | $\{0, 4, 4, 4\}$     | $\{4, 4, 4, 4, 4, 4\}$ | $\{0, 4, 4, 4\}$     |

## S4 Persistence Homology

Persistence Homology is an algebraic topology-based method for the multiscale analysis of the topological invariants of functions and datasets. It has been widely applied in the field of topological data analysis. We provide a brief introduction to persistent homology and the interested readers are referred to the literature [1,2] for more detail.

### S4.1 Homology

For a topological space  $X$ , a sequences of complexes  $C_0(X), C_1(X), \dots$  describes different dimensional information of the topological space  $X$ , which are connected by homomorphisms (or boundary operators)

$\partial_k : C_k \rightarrow C_{k-1}$  such that  $\text{im } \partial_k \subseteq \ker \partial_{k-1}$ , i.e.,  $\partial_{k-1}\partial_k = 0$ . With a  $k$ -simplex  $\sigma_k = [v_0, \dots, v_k]$  where  $v_i$  are all the vertices of  $\sigma_k$ ,  $\partial_k\sigma_k$  can be given by a formal sum with coefficients in the  $\mathbb{Z}_2$  field

$$\partial_k\sigma_k = \sum_{i=0}^k \sigma_{k-1}^i, \quad (\text{S4.1})$$

where  $\sigma_{k-1}^i$  is the  $(k-1)$ -simplex with its  $i$ th vertex  $v_i$  being omitted. The algebraic construction to connect a sequence of complexes by boundary maps is called a chain complex

$$\dots \xrightarrow{\partial_{i+1}} C_i(X) \xrightarrow{\partial_i} C_{i-1}(X) \xrightarrow{\partial_{i-1}} \dots \xrightarrow{\partial_2} C_1(X) \xrightarrow{\partial_1} C_0(X) \xrightarrow{\partial_0} 0$$

and the  $k$ th homology group is the quotient group defined by

$$H_k = \ker \partial_k / \text{im } \partial_{k+1}. \quad (\text{S4.2})$$

By studying homology groups, one can derive homological properties of the space  $K$ . The Betti numbers are defined by the ranks of  $k$ th homology group  $H_k$  which counts  $k$ -dimensional holes, especially,  $\text{rank}(H_0)$  reflects the number of connected components,  $\text{rank}(H_1)$  reflects the number of loops, and  $\text{rank}(H_2)$  reveals the number of voids or cavities. However,  $\text{rank}(H_k)$  only allows us to express the topological information for a specific setup. Persistent homology is devised to track the multiscale topological information over different scales along a filtration.

## S4.2 Persistent homology

A filtration of a topology space  $K$  is a sequence of sub-spaces  $(K_t)_{t=0}^m$  of  $K$  such that

$$\emptyset = K_0 \subseteq K_1 \subseteq K_2 \subseteq \dots \subseteq K_m = K. \quad (\text{S4.3})$$

A sequence of chain complexes induced by the filtration is defined as

$$\begin{array}{cccccccc} \dots & \xrightarrow{\partial_3} & C_2^1 & \xrightarrow{\partial_2} & C_1^1 & \xrightarrow{\partial_1} & C_0^1 & \xrightarrow{\partial_0} & 0 \\ & & \downarrow & & \downarrow & & \downarrow & & \\ \dots & \xrightarrow{\partial_3} & C_2^2 & \xrightarrow{\partial_2} & C_1^2 & \xrightarrow{\partial_1} & C_0^2 & \xrightarrow{\partial_0} & 0 \\ & & \downarrow & & \downarrow & & \downarrow & & \\ \dots & \xrightarrow{\partial_3} & C_2^m & \xrightarrow{\partial_2} & C_1^m & \xrightarrow{\partial_1} & C_0^m & \xrightarrow{\partial_0} & 0 \end{array} \quad (\text{S4.4})$$

with  $C_k^t := C_k(K^t)$  and  $\downarrow$  denotes the inclusion [3]. The  $p$ -persistent  $k$ th homology group of  $K^t$  is defined as

$$H_k^p(K^t) = \ker \partial_k(K^t) / (\text{im } \partial_{k+1}(K^{t+p}) \cap \ker \partial_k(K^t)), \quad (\text{S4.5})$$

Intuitively, this homology group records the homology classes of  $K^t$  that are persistent at least until  $K^{t+p}$ . When  $k = 0$ , the rank of  $H_k^p(K^t)$  reveals the number of connected components in  $K^t$ .

## S5 Implement PST to distinguish different topological structures

(A supplementary example to distinguish different topological structures by implementing PST in the Section 2.3.3.)

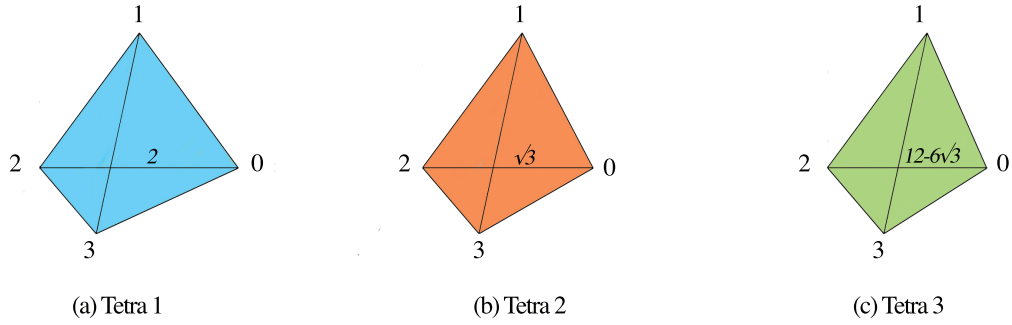

Figure 4: Three tetrahedrons with different topological shape in  $\mathbb{R}^3$ . (a) Regular tetrahedron with edge length 2. (b) Move  $v_0$  along the edge  $[v_0, v_1]$  and construct a new tetrahedron with the length of  $[v_0, v_1]$  to be  $\sqrt{3}$ . (c) Move  $v_0$  along the edge  $[v_0, v_1]$  and construct a new tetrahedron with the length of  $[v_0, v_1]$  being  $12 - 6\sqrt{3}$ .

Figure 4 and Figure 5 exemplify the capacity of persistent spectral theory to discriminate between different structures in  $\mathbb{R}^3$ . In Figure 5(a), we employ the persistent spectral analysis based on the  $\beta_0^{r+0}$  tendency along the filtration to distinguish three tetrahedrons. As  $r$  grows, isolated points (0-simplices) will gradually grow into solid 2-spheres, and a new isolated component will be created once two spheres corresponding to two isolated points overlap with each other. Since  $\beta_0^{r+0}$  represents the number of isolated components, the value of  $\beta_0^{r+0}$  will finally decrease to 1. Take Tetra 2 as an example. It is seen that at the initial setup ( $r = 0.0$ ), the number of isolated components is 4, which represents the number of isolated points. When  $r$  is around 0.63, two spheres centered at  $v_0$  and  $v_2$  with radius 0.63 overlapped with each other. Therefore,  $\beta_0^{r+0}$  reduces to 3 at this point. With  $r$  keeping growing, the sphere centered at  $v_0$  overlaps with spheres centered at  $v_1, v_2$ , and  $v_3$ , which results  $\beta_0^{r+0} = 1$  after  $r = 0.87$ . Similarly, the smallest non-zero eigenvalue  $(\tilde{\lambda}_2)_0^{r+0}$  changes at radius 0.63 and 0.87 in Figure 5(b), which also affirms that the solid spheres get overlapped at these specific filtration parameters. It is clear that Tetrahedron 1, 2, and 3 have different  $\beta_0^{r+0}$  and  $(\tilde{\lambda}_2)_0^{r+0}$  values. Since 1-cycle and 2-cycle are not formed along with the filtration, analysis of  $\beta_1^{r+0}$  and  $\beta_2^{r+0}$  will not be mentioned in this case.

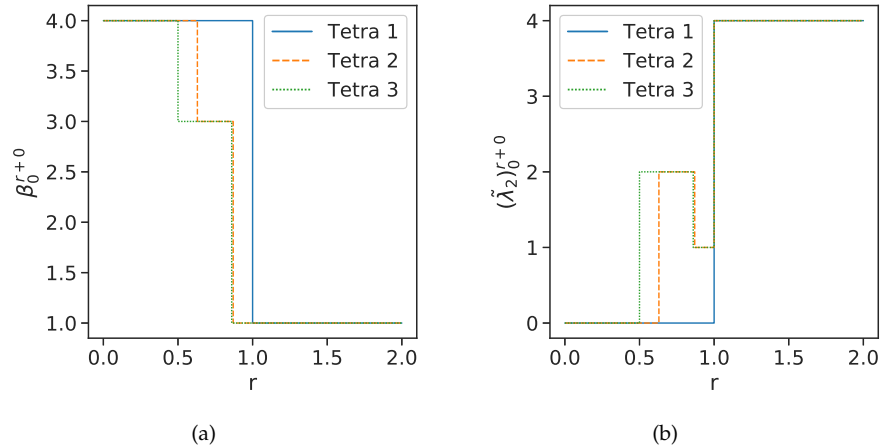

Figure 5: (a) Plot of  $\beta_0^{r+0}$  with radius filtration  $r$  among 3 different tetrahedrons. (b) Plot of  $(\tilde{\lambda}_2)_0^{r+0}$  with radius filtration  $r$  among 3 different tetrahedrons.



## S6 Additional Laplacian matrices and their properties

In this section, we give a further description of additional boundary and Laplacian matrices and their properties involved in the filtration process in Figure 6. Detailed information are listed in the Table 5 - Table 23.

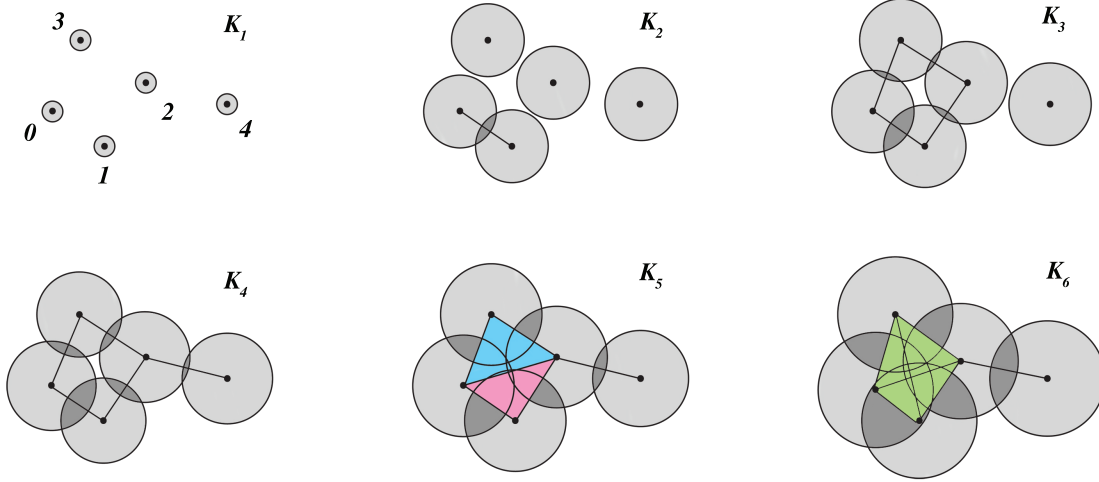

Figure 6: Illustration of filtration. We use 0, 1, 2, 3, and 4 to stand for 0-simplices, 01, 12, 23, 03, 24, 02, and 13 for 1-simplices, 012, 023, 013, and 123 for 2-simplices, and 0123 for the 3-simplex. Here,  $K_1$  has five 0-cycles,  $K_2$  has four 0-cycles,  $K_3$  has two 0-cycles and a 1-cycle,  $K_4$  has a 0-cycle and a 1-cycle,  $K_5$  has one 0-cycle, and  $K_6$  has a 0-cycle.

Table 5:  $K_1 \rightarrow K_1$

| $q$                                   | $q = 0$                                                                                                                               | $q = 1$ | $q = 2$ |
|---------------------------------------|---------------------------------------------------------------------------------------------------------------------------------------|---------|---------|
| $\mathcal{B}_{q+1}^{1+0}$             | /                                                                                                                                     | /       | /       |
| $\mathcal{B}_q^1$                     | $\begin{matrix} 0 & 1 & 2 & 3 & 4 \\ [0 & 0 & 0 & 0 & 0] \end{matrix}$                                                                | /       | /       |
| $\mathcal{L}_q^{1+0}$                 | $\begin{bmatrix} 0 & 0 & 0 & 0 & 0 \\ 0 & 0 & 0 & 0 & 0 \\ 0 & 0 & 0 & 0 & 0 \\ 0 & 0 & 0 & 0 & 0 \\ 0 & 0 & 0 & 0 & 0 \end{bmatrix}$ | /       | /       |
| $\beta_q^{1+0}$                       | 5                                                                                                                                     | /       | /       |
| $\dim(\mathcal{L}_q^{1+0})$           | 5                                                                                                                                     | /       | /       |
| $\text{rank}(\mathcal{L}_q^{1+0})$    | 0                                                                                                                                     | /       | /       |
| $\text{nullity}(\mathcal{L}_q^{1+0})$ | 5                                                                                                                                     | /       | /       |
| $\text{Spectra}(\mathcal{L}_q^{1+0})$ | $\{0, 0, 0, 0, 0\}$                                                                                                                   | /       | /       |

Table 6:  $K_2 \rightarrow K_2$ 

| $q$                                   | $q = 0$                                                                                                                                   | $q = 1$                                                                                       | $q = 2$ |
|---------------------------------------|-------------------------------------------------------------------------------------------------------------------------------------------|-----------------------------------------------------------------------------------------------|---------|
| $\mathcal{B}_{q+1}^{2+0}$             | $ \begin{array}{c} 01 \\ 0 \begin{bmatrix} -1 \\ 1 \\ 2 \\ 3 \\ 4 \end{bmatrix} \end{array} $                                             | /                                                                                             | /       |
| $\mathcal{B}_q^2$                     | $ \begin{array}{ccccc} 0 & 1 & 2 & 3 & 4 \\ [ 0 & 0 & 0 & 0 & 0 ] \end{array} $                                                           | $ \begin{array}{c} 01 \\ 0 \begin{bmatrix} -1 \\ 1 \\ 2 \\ 3 \\ 4 \end{bmatrix} \end{array} $ | /       |
| $\mathcal{L}_q^{2+0}$                 | $ \begin{bmatrix} 1 & -1 & 0 & 0 & 0 \\ -1 & 1 & 0 & 0 & 0 \\ 0 & 0 & 0 & 0 & 0 \\ 0 & 0 & 0 & 0 & 0 \\ 0 & 0 & 0 & 0 & 0 \end{bmatrix} $ | [2]                                                                                           | /       |
| $\beta_q^{2+0}$                       | 4                                                                                                                                         | 0                                                                                             | /       |
| $\dim(\mathcal{L}_q^{2+0})$           | 5                                                                                                                                         | 1                                                                                             | /       |
| $\text{rank}(\mathcal{L}_q^{2+0})$    | 1                                                                                                                                         | 1                                                                                             | /       |
| $\text{nullity}(\mathcal{L}_q^{2+0})$ | 4                                                                                                                                         | 0                                                                                             | /       |
| $\text{Spectra}(\mathcal{L}_q^{2+0})$ | {0, 0, 0, 0, 2}                                                                                                                           | 2                                                                                             | /       |

Table 7:  $K_3 \rightarrow K_3$ 

| $q$                                   | $q = 0$                                                                                                                                                                                                | $q = 1$                                                                                                                                                                                                | $q = 2$ |
|---------------------------------------|--------------------------------------------------------------------------------------------------------------------------------------------------------------------------------------------------------|--------------------------------------------------------------------------------------------------------------------------------------------------------------------------------------------------------|---------|
| $\mathcal{B}_{q+1}^{3+0}$             | $\begin{array}{c} 01 \quad 12 \quad 23 \quad 03 \\ 0 \left[ \begin{array}{cccc} -1 & 0 & 0 & -1 \\ 1 & 1 & -1 & 0 \\ 2 & 0 & 1 & -1 \\ 3 & 0 & 0 & 1 \\ 4 & 0 & 0 & 0 \end{array} \right] \end{array}$ | /                                                                                                                                                                                                      | /       |
| $\mathcal{B}_q^3$                     | $\begin{array}{c} 0 \quad 1 \quad 2 \quad 3 \quad 4 \\ [ 0 \quad 0 \quad 0 \quad 0 \quad 0 ] \end{array}$                                                                                              | $\begin{array}{c} 01 \quad 12 \quad 23 \quad 03 \\ 0 \left[ \begin{array}{cccc} -1 & 0 & 0 & -1 \\ 1 & 1 & -1 & 0 \\ 2 & 0 & 1 & -1 \\ 3 & 0 & 0 & 1 \\ 4 & 0 & 0 & 0 \end{array} \right] \end{array}$ | /       |
| $\mathcal{L}_q^{3+0}$                 | $\left[ \begin{array}{ccccc} 2 & -1 & 0 & -1 & 0 \\ -1 & 2 & -1 & 0 & 0 \\ 0 & -1 & 2 & -1 & 0 \\ -1 & 0 & -1 & 2 & 0 \\ 0 & 0 & 0 & 0 & 0 \end{array} \right]$                                        | $\left[ \begin{array}{cccc} 2 & -1 & 0 & 1 \\ -1 & 2 & -1 & 0 \\ 0 & -1 & 2 & 1 \\ 1 & 0 & 1 & 2 \end{array} \right]$                                                                                  | /       |
| $\beta_q^{3+0}$                       | 2                                                                                                                                                                                                      | 1                                                                                                                                                                                                      | /       |
| $\dim(\mathcal{L}_q^{3+0})$           | 5                                                                                                                                                                                                      | 4                                                                                                                                                                                                      | /       |
| $\text{rank}(\mathcal{L}_q^{3+0})$    | 3                                                                                                                                                                                                      | 3                                                                                                                                                                                                      | /       |
| $\text{nullity}(\mathcal{L}_q^{3+0})$ | 2                                                                                                                                                                                                      | 1                                                                                                                                                                                                      | /       |
| $\text{Spectra}(\mathcal{L}_q^{3+0})$ | $\{0, 0, 2, 2, 4\}$                                                                                                                                                                                    | $\{0, 2, 2, 4\}$                                                                                                                                                                                       | /       |

Table 8:  $K_5 \rightarrow K_5$ 

| $q$                                   | $q = 0$                                                                                                                                                                                                                                   | $q = 1$                                                                                                                                                                                                                                   | $q = 2$                                                                                                                                                    |
|---------------------------------------|-------------------------------------------------------------------------------------------------------------------------------------------------------------------------------------------------------------------------------------------|-------------------------------------------------------------------------------------------------------------------------------------------------------------------------------------------------------------------------------------------|------------------------------------------------------------------------------------------------------------------------------------------------------------|
| $\mathcal{B}_{q+1}^{5+0}$             | $\begin{array}{c} 01 \ 12 \ 23 \ 03 \ 24 \ 02 \\ 0 \begin{bmatrix} -1 & 0 & 0 & -1 & 0 & -1 \\ 1 & 1 & -1 & 0 & 0 & 0 \\ 2 & 0 & 1 & -1 & 0 & -1 & 1 \\ 3 & 0 & 0 & 1 & 1 & 0 & 0 \\ 4 & 0 & 0 & 0 & 0 & 1 & 0 \end{bmatrix} \end{array}$ | $\begin{array}{c} 012 \ 023 \\ 01 \begin{bmatrix} 1 & 0 \\ 12 & 1 & 0 \\ 23 & 0 & 1 \\ 03 & 0 & -1 \\ 24 & 0 & 0 \\ 02 & -1 & 1 \end{bmatrix} \end{array}$                                                                                | $\begin{array}{c} 0123 \\ 012 \begin{bmatrix} -1 \\ 023 & 1 \end{bmatrix} \end{array}$                                                                     |
| $\mathcal{B}_q^5$                     | $\begin{array}{c} 0 \ 1 \ 2 \ 3 \ 4 \\ [0 \ 0 \ 0 \ 0 \ 0] \end{array}$                                                                                                                                                                   | $\begin{array}{c} 01 \ 12 \ 23 \ 03 \ 24 \ 02 \\ 0 \begin{bmatrix} -1 & 0 & 0 & -1 & 0 & -1 \\ 1 & 1 & -1 & 0 & 0 & 0 \\ 2 & 0 & 1 & -1 & 0 & -1 & 1 \\ 3 & 0 & 0 & 1 & 1 & 0 & 0 \\ 4 & 0 & 0 & 0 & 0 & 1 & 0 \end{bmatrix} \end{array}$ | $\begin{array}{c} 012 \ 023 \\ 01 \begin{bmatrix} 1 & 0 \\ 12 & 1 & 0 \\ 23 & 0 & 1 \\ 03 & 0 & -1 \\ 24 & 0 & 0 \\ 02 & -1 & 1 \end{bmatrix} \end{array}$ |
| $\mathcal{L}_q^{5+0}$                 | $\begin{bmatrix} 3 & -1 & -1 & -1 & 0 \\ -1 & 2 & -1 & 0 & 0 \\ -1 & -1 & 4 & -1 & -1 \\ -1 & 0 & -1 & 2 & 0 \\ 0 & 0 & -1 & 0 & 1 \end{bmatrix}$                                                                                         | $\begin{bmatrix} 3 & 0 & 0 & 1 & 0 & 0 \\ 0 & 3 & -1 & 0 & -1 & 0 \\ 0 & -1 & 3 & 0 & 1 & 0 \\ 1 & 0 & 0 & 3 & 0 & 0 \\ 0 & -1 & 1 & 0 & 2 & -1 \\ 0 & 0 & 0 & 0 & -1 & 4 \end{bmatrix}$                                                  | $\begin{bmatrix} 4 & 0 \\ 0 & 4 \end{bmatrix}$                                                                                                             |
| $\beta_q^{5+0}$                       | 1                                                                                                                                                                                                                                         | 0                                                                                                                                                                                                                                         | 0                                                                                                                                                          |
| $\dim(\mathcal{L}_q^{5+0})$           | 5                                                                                                                                                                                                                                         | 6                                                                                                                                                                                                                                         | 2                                                                                                                                                          |
| $\text{rank}(\mathcal{L}_q^{5+0})$    | 4                                                                                                                                                                                                                                         | 6                                                                                                                                                                                                                                         | 2                                                                                                                                                          |
| $\text{nullity}(\mathcal{L}_q^{5+0})$ | 1                                                                                                                                                                                                                                         | 0                                                                                                                                                                                                                                         | 0                                                                                                                                                          |
| $\text{Spectra}(\mathcal{L}_q^{5+0})$ | {0, 1, 2, 4, 5}                                                                                                                                                                                                                           | {1, 2, 2, 4, 4, 5}                                                                                                                                                                                                                        | {4, 4}                                                                                                                                                     |

Table 9:  $K_1 \rightarrow K_2$ 

| $q$                                   | $q = 0$                                                                                                                                   | $q = 1$ | $q = 2$ |
|---------------------------------------|-------------------------------------------------------------------------------------------------------------------------------------------|---------|---------|
| $\mathcal{B}_{q+1}^{1+1}$             | $ \begin{array}{c} 01 \\ 0 \begin{bmatrix} -1 \\ 1 \\ 2 \\ 3 \\ 4 \end{bmatrix} \end{array} $                                             | /       | /       |
| $\mathcal{B}_q^1$                     | $ \begin{array}{c} 0 \ 1 \ 2 \ 3 \ 4 \\ [ 0 \ 0 \ 0 \ 0 \ 0 ] \end{array} $                                                               | /       | /       |
| $\mathcal{L}_q^{1+1}$                 | $ \begin{bmatrix} 1 & -1 & 0 & 0 & 0 \\ -1 & 1 & 0 & 0 & 0 \\ 0 & 0 & 0 & 0 & 0 \\ 0 & 0 & 0 & 0 & 0 \\ 0 & 0 & 0 & 0 & 0 \end{bmatrix} $ | /       | /       |
| $\beta_q^{1+1}$                       | 4                                                                                                                                         | /       | /       |
| $\dim(\mathcal{L}_q^{1+1})$           | 5                                                                                                                                         | /       | /       |
| $\text{rank}(\mathcal{L}_q^{1+1})$    | 1                                                                                                                                         | /       | /       |
| $\text{nullity}(\mathcal{L}_q^{1+1})$ | 4                                                                                                                                         | /       | /       |
| $\text{Spectra}(\mathcal{L}_q^{1+1})$ | $\{0, 0, 0, 0, 2\}$                                                                                                                       | /       | /       |

Table 10:  $K_1 \rightarrow K_3$ 

| $q$                                    | $q = 0$                                                                                                                                                                                                | $q = 1$ | $q = 2$ |
|----------------------------------------|--------------------------------------------------------------------------------------------------------------------------------------------------------------------------------------------------------|---------|---------|
| $\mathcal{B}_{q+1}^{1+2}$              | $\begin{array}{c} 01 \quad 12 \quad 23 \quad 03 \\ 0 \left[ \begin{array}{cccc} -1 & 0 & 0 & -1 \\ 1 & 1 & -1 & 0 \\ 2 & 0 & 1 & -1 \\ 3 & 0 & 0 & 1 \\ 4 & 0 & 0 & 0 \end{array} \right] \end{array}$ | /       | /       |
| $\mathcal{B}_q^1$                      | $\begin{array}{c} 0 \quad 1 \quad 2 \quad 3 \quad 4 \\ / \left[ \begin{array}{ccccc} 0 & 0 & 0 & 0 & 0 \end{array} \right] \end{array}$                                                                | /       | /       |
| $\mathcal{L}_q^{1+2}$                  | $\left[ \begin{array}{ccccc} 2 & -1 & 0 & -1 & 0 \\ -1 & 2 & -1 & 0 & 0 \\ 0 & -1 & 2 & -1 & 0 \\ -1 & 0 & -1 & 2 & 0 \\ 0 & 0 & 0 & 0 & 0 \end{array} \right]$                                        | /       | /       |
| $\beta_q^{1+2}$                        | 2                                                                                                                                                                                                      | /       | /       |
| $\dim(\mathcal{L}_q^{1+2})$            | 5                                                                                                                                                                                                      | /       | /       |
| $\text{rank}(\mathcal{L}_q^{1+2})$     | 3                                                                                                                                                                                                      | /       | /       |
| $\text{nullity}(\mathcal{L}_q^{1+2})$  | 2                                                                                                                                                                                                      | /       | /       |
| $\text{Spectrum}(\mathcal{L}_q^{1+2})$ | $\{0, 0, 2, 2, 4\}$                                                                                                                                                                                    | /       | /       |

Table 11:  $K_1 \rightarrow K_4$ 

| $q$                                   | $q = 0$                                                                                                                                                                                                                                                             | $q = 1$ | $q = 2$ |
|---------------------------------------|---------------------------------------------------------------------------------------------------------------------------------------------------------------------------------------------------------------------------------------------------------------------|---------|---------|
| $\mathcal{B}_{q+1}^{1+3}$             | $\begin{array}{c} 01 \quad 12 \quad 23 \quad 03 \quad 24 \\ \begin{matrix} 0 \\ 1 \\ 2 \\ 3 \\ 4 \end{matrix} \begin{bmatrix} -1 & 0 & 0 & -1 & 0 \\ 1 & -1 & 0 & 0 & 0 \\ 0 & 1 & -1 & 0 & -1 \\ 0 & 0 & 1 & 1 & 0 \\ 0 & 0 & 0 & 0 & 1 \end{bmatrix} \end{array}$ | /       | /       |
| $\mathcal{B}_q^1$                     | $\begin{array}{c} 0 \quad 1 \quad 2 \quad 3 \quad 4 \\ [ 0 \quad 0 \quad 0 \quad 0 \quad 0 ] \end{array}$                                                                                                                                                           | /       | /       |
| $\mathcal{L}_q^{1+3}$                 | $\begin{bmatrix} 2 & -1 & 0 & -1 & 0 \\ -1 & 2 & -1 & 0 & 0 \\ 0 & -1 & 3 & -1 & -1 \\ -1 & 0 & -1 & 2 & 0 \\ 0 & 0 & -1 & 0 & 1 \end{bmatrix}$                                                                                                                     | /       | /       |
| $\beta_q^{1+3}$                       | 1                                                                                                                                                                                                                                                                   | /       | /       |
| $\dim(\mathcal{L}_q^{1+3})$           | 5                                                                                                                                                                                                                                                                   | /       | /       |
| $\text{rank}(\mathcal{L}_q^{1+3})$    | 4                                                                                                                                                                                                                                                                   | /       | /       |
| $\text{nullity}(\mathcal{L}_q^{1+3})$ | 1                                                                                                                                                                                                                                                                   | /       | /       |
| $\text{Spectra}(\mathcal{L}_q^{1+3})$ | {0, 0.8299, 2, 2.6889, 4.4812}                                                                                                                                                                                                                                      | /       | /       |

Table 12:  $K_1 \rightarrow K_5$ 

| $q$                                   | $q = 0$                                                                                                                                                                                                                                                                | $q = 1$ | $q = 2$ |
|---------------------------------------|------------------------------------------------------------------------------------------------------------------------------------------------------------------------------------------------------------------------------------------------------------------------|---------|---------|
| $\mathcal{B}_{q+1}^{1+4}$             | $ \begin{array}{c} 01 \quad 12 \quad 23 \quad 03 \quad 24 \quad 02 \\ 0 \left[ \begin{array}{cccccc} -1 & 0 & 0 & -1 & 0 & -1 \\ 1 & 1 & -1 & 0 & 0 & 0 \\ 2 & 0 & 1 & -1 & 0 & -1 \\ 3 & 0 & 0 & 1 & 1 & 0 \\ 4 & 0 & 0 & 0 & 0 & 1 \end{array} \right] \end{array} $ | /       | /       |
| $\mathcal{B}_q^1$                     | $ \begin{array}{c} 0 \quad 1 \quad 2 \quad 3 \quad 4 \\ [ 0 \quad 0 \quad 0 \quad 0 \quad 0 ] \end{array} $                                                                                                                                                            | /       | /       |
| $\mathcal{L}_q^{1+4}$                 | $ \left[ \begin{array}{ccccc} 3 & -1 & -1 & -1 & 0 \\ -1 & 2 & -1 & 0 & 0 \\ -1 & -1 & 4 & -1 & -1 \\ -1 & 0 & -1 & 2 & 0 \\ 0 & 0 & -1 & 0 & 1 \end{array} \right] $                                                                                                  | /       | /       |
| $\beta_q^{1+4}$                       | 1                                                                                                                                                                                                                                                                      | /       | /       |
| $\dim(\mathcal{L}_q^{1+4})$           | 5                                                                                                                                                                                                                                                                      | /       | /       |
| $\text{rank}(\mathcal{L}_q^{1+4})$    | 4                                                                                                                                                                                                                                                                      | /       | /       |
| $\text{nullity}(\mathcal{L}_q^{1+4})$ | 1                                                                                                                                                                                                                                                                      | /       | /       |
| $\text{Spectra}(\mathcal{L}_q^{1+4})$ | $\{0, 1, 2, 4, 5\}$                                                                                                                                                                                                                                                    | /       | /       |



Table 13:  $K_1 \rightarrow K_6$ 

| $q$                                   | $q = 0$                                                                                                                                                                                                                                                                                                        | $q = 1$ | $q = 2$ |
|---------------------------------------|----------------------------------------------------------------------------------------------------------------------------------------------------------------------------------------------------------------------------------------------------------------------------------------------------------------|---------|---------|
| $\mathcal{B}_{q+1}^{1+5}$             | $\begin{array}{c} 01 \quad 12 \quad 23 \quad 03 \quad 24 \quad 02 \quad 13 \\ 0 \left[ \begin{array}{cccccc} -1 & 0 & 0 & -1 & 0 & -1 & 0 \\ 1 & 1 & -1 & 0 & 0 & 0 & -1 \\ 2 & 0 & 1 & -1 & 0 & -1 & 1 & 0 \\ 3 & 0 & 0 & 1 & 1 & 0 & 0 & 1 \\ 4 & 0 & 0 & 0 & 0 & 1 & 0 & 0 \end{array} \right] \end{array}$ | /       | /       |
| $\mathcal{B}_q^1$                     | $\begin{array}{c} 0 \quad 1 \quad 2 \quad 3 \quad 4 \\ [ 0 \quad 0 \quad 0 \quad 0 \quad 0 ] \end{array}$                                                                                                                                                                                                      | /       | /       |
| $\mathcal{L}_q^{1+5}$                 | $\left[ \begin{array}{ccccc} 3 & -1 & -1 & -1 & 0 \\ -1 & 3 & -1 & -1 & 0 \\ -1 & -1 & 4 & -1 & -1 \\ -1 & -1 & -1 & 3 & 0 \\ 0 & 0 & -1 & 0 & 1 \end{array} \right]$                                                                                                                                          | /       | /       |
| $\beta_q^{1+5}$                       | 1                                                                                                                                                                                                                                                                                                              | /       | /       |
| $\dim(\mathcal{L}_q^{1+5})$           | 5                                                                                                                                                                                                                                                                                                              | /       | /       |
| $\text{rank}(\mathcal{L}_q^{1+5})$    | 4                                                                                                                                                                                                                                                                                                              | /       | /       |
| $\text{nullity}(\mathcal{L}_q^{1+5})$ | 1                                                                                                                                                                                                                                                                                                              | /       | /       |
| $\text{Spectra}(\mathcal{L}_q^{1+5})$ | {0, 1, 4, 4, 5}                                                                                                                                                                                                                                                                                                | /       | /       |

Table 14:  $K_2 \rightarrow K_3$ 

| $q$                                   | $q = 0$                                                                                                                                                                                                | $q = 1$                                                                                                   | $q = 2$ |
|---------------------------------------|--------------------------------------------------------------------------------------------------------------------------------------------------------------------------------------------------------|-----------------------------------------------------------------------------------------------------------|---------|
| $\mathcal{B}_{q+1}^{2+1}$             | $\begin{array}{c} 01 \quad 12 \quad 23 \quad 03 \\ 0 \left[ \begin{array}{cccc} -1 & 0 & 0 & -1 \\ 1 & 1 & -1 & 0 \\ 2 & 0 & 1 & -1 \\ 3 & 0 & 0 & 1 \\ 4 & 0 & 0 & 0 \end{array} \right] \end{array}$ | /                                                                                                         | /       |
| $\mathcal{B}_q^2$                     | $\begin{array}{c} 0 \quad 1 \quad 2 \quad 3 \quad 4 \\ [ 0 \quad 0 \quad 0 \quad 0 \quad 0 ] \end{array}$                                                                                              | $\begin{array}{c} 01 \\ 0 \left[ \begin{array}{c} -1 \\ 1 \\ 0 \\ 0 \\ 0 \end{array} \right] \end{array}$ | /       |
| $\mathcal{L}_q^{2+1}$                 | $\left[ \begin{array}{ccccc} 2 & -1 & 0 & -1 & 0 \\ -1 & 2 & -1 & 0 & 0 \\ 0 & -1 & 2 & -1 & 0 \\ -1 & 0 & -1 & 2 & 0 \\ 0 & 0 & 0 & 0 & 0 \end{array} \right]$                                        | [2]                                                                                                       | /       |
| $\beta_q^{2+1}$                       | 2                                                                                                                                                                                                      | 0                                                                                                         | /       |
| $\dim(\mathcal{L}_q^{2+1})$           | 5                                                                                                                                                                                                      | 1                                                                                                         | /       |
| $\text{rank}(\mathcal{L}_q^{2+1})$    | 3                                                                                                                                                                                                      | 1                                                                                                         | /       |
| $\text{nullity}(\mathcal{L}_q^{2+1})$ | 2                                                                                                                                                                                                      | 0                                                                                                         | /       |
| $\text{Spectra}(\mathcal{L}_q^{2+1})$ | {0, 0, 2, 2, 4}                                                                                                                                                                                        | 2                                                                                                         | /       |

Table 15:  $K_2 \rightarrow K_4$ 

| $q$                                   | $q = 0$                                                                                                                                                                                                                              | $q = 1$                                                                                                                       | $q = 2$ |
|---------------------------------------|--------------------------------------------------------------------------------------------------------------------------------------------------------------------------------------------------------------------------------------|-------------------------------------------------------------------------------------------------------------------------------|---------|
| $\mathcal{B}_{q+1}^{2+2}$             | $\begin{array}{c} 01 \quad 12 \quad 23 \quad 03 \quad 24 \\ 0 \left[ \begin{array}{ccccc} -1 & 0 & 0 & -1 & 0 \\ 1 & 1 & -1 & 0 & 0 \\ 2 & 0 & 1 & -1 & 0 \\ 3 & 0 & 0 & 1 & 1 \\ 4 & 0 & 0 & 0 & 0 \end{array} \right] \end{array}$ | /                                                                                                                             | /       |
| $\mathcal{B}_q^2$                     | $\begin{array}{c} 0 \quad 1 \quad 2 \quad 3 \quad 4 \\ [ 0 \quad 0 \quad 0 \quad 0 \quad 0 ] \end{array}$                                                                                                                            | $\begin{array}{c} 01 \\ 0 \left[ \begin{array}{c} -1 \\ 1 \\ 0 \\ 0 \\ 0 \end{array} \right] \\ 1 \\ 2 \\ 3 \\ 4 \end{array}$ | /       |
| $\mathcal{L}_q^{2+2}$                 | $\left[ \begin{array}{ccccc} 2 & -1 & 0 & -1 & 0 \\ -1 & 2 & -1 & 0 & 0 \\ 0 & -1 & 3 & -1 & -1 \\ -1 & 0 & -1 & 2 & 0 \\ 0 & 0 & -1 & 0 & 1 \end{array} \right]$                                                                    | [2]                                                                                                                           | /       |
| $\beta_q^{2+2}$                       | 1                                                                                                                                                                                                                                    | 0                                                                                                                             | /       |
| $\dim(\mathcal{L}_q^{2+2})$           | 5                                                                                                                                                                                                                                    | 1                                                                                                                             | /       |
| $\text{rank}(\mathcal{L}_q^{2+2})$    | 4                                                                                                                                                                                                                                    | 1                                                                                                                             | /       |
| $\text{nullity}(\mathcal{L}_q^{2+2})$ | 1                                                                                                                                                                                                                                    | 0                                                                                                                             | /       |
| $\text{Spectra}(\mathcal{L}_q^{2+2})$ | {0, 0.8299, 2, 2.6889, 4.4812}                                                                                                                                                                                                       | 2                                                                                                                             | /       |

Table 16:  $K_2 \rightarrow K_5$ 

| $q$                                   | $q = 0$                                                                                                                                                                                                                                          | $q = 1$                                                                                                                       | $q = 2$ |
|---------------------------------------|--------------------------------------------------------------------------------------------------------------------------------------------------------------------------------------------------------------------------------------------------|-------------------------------------------------------------------------------------------------------------------------------|---------|
| $\mathcal{B}_{q+1}^{2+3}$             | $\begin{array}{c} 01 \ 12 \ 23 \ 03 \ 24 \ 02 \\ 0 \left[ \begin{array}{cccccc} -1 & 0 & 0 & -1 & 0 & -1 \\ 1 & 1 & -1 & 0 & 0 & 0 \\ 2 & 0 & 1 & -1 & 0 & -1 \\ 3 & 0 & 0 & 1 & 1 & 0 \\ 4 & 0 & 0 & 0 & 0 & 1 \end{array} \right] \end{array}$ | $\begin{array}{c} 012 \ 023 \\ 01 \left[ \begin{array}{cc} 1 & 0 \end{array} \right] \end{array}$                             | /       |
| $\mathcal{B}_q^2$                     | $\begin{array}{c} 0 \ 1 \ 2 \ 3 \ 4 \\ \left[ \begin{array}{ccccc} 0 & 0 & 0 & 0 & 0 \end{array} \right] \end{array}$                                                                                                                            | $\begin{array}{c} 01 \\ 0 \left[ \begin{array}{c} -1 \\ 1 \\ 0 \\ 0 \\ 0 \end{array} \right] \\ 1 \\ 2 \\ 3 \\ 4 \end{array}$ | /       |
| $\mathcal{L}_q^{2+3}$                 | $\left[ \begin{array}{ccccc} 3 & -1 & -1 & -1 & 0 \\ -1 & 3 & -1 & -1 & 0 \\ -1 & -1 & 4 & -1 & -1 \\ -1 & -1 & -1 & 3 & 0 \\ 0 & 0 & -1 & 0 & 1 \end{array} \right]$                                                                            | [3]                                                                                                                           | /       |
| $\beta_q^{2+3}$                       | 1                                                                                                                                                                                                                                                | 0                                                                                                                             | /       |
| $\dim(\mathcal{L}_q^{2+3})$           | 5                                                                                                                                                                                                                                                | 1                                                                                                                             | /       |
| $\text{rank}(\mathcal{L}_q^{2+3})$    | 4                                                                                                                                                                                                                                                | 1                                                                                                                             | /       |
| $\text{nullity}(\mathcal{L}_q^{2+3})$ | 1                                                                                                                                                                                                                                                | 0                                                                                                                             | /       |
| $\text{Spectra}(\mathcal{L}_q^{2+3})$ | {0, 1, 2, 4, 5}                                                                                                                                                                                                                                  | 3                                                                                                                             | /       |

Table 17:  $K_2 \rightarrow K_6$ 

| $q$                                   | $q = 0$                                                                                                                                                                                                                                                                                                        | $q = 1$                                                                                                                             | $q = 2$ |
|---------------------------------------|----------------------------------------------------------------------------------------------------------------------------------------------------------------------------------------------------------------------------------------------------------------------------------------------------------------|-------------------------------------------------------------------------------------------------------------------------------------|---------|
| $\mathcal{B}_{q+1}^{2+4}$             | $\begin{array}{c} 01 \quad 12 \quad 23 \quad 03 \quad 24 \quad 02 \quad 13 \\ 0 \left[ \begin{array}{cccccc} -1 & 0 & 0 & -1 & 0 & -1 & 0 \\ 1 & 1 & -1 & 0 & 0 & 0 & -1 \\ 2 & 0 & 1 & -1 & 0 & -1 & 1 & 0 \\ 3 & 0 & 0 & 1 & 1 & 0 & 0 & 1 \\ 4 & 0 & 0 & 0 & 0 & 1 & 0 & 0 \end{array} \right] \end{array}$ | $\begin{array}{c} 012 \quad 023 \quad 013 \quad 123 \\ 01 \left[ \begin{array}{cccc} 1 & 0 & 1 & 0 \end{array} \right] \end{array}$ | /       |
| $\mathcal{B}_q^2$                     | $\begin{array}{c} 0 \quad 1 \quad 2 \quad 3 \quad 4 \\ \left[ \begin{array}{ccccc} 0 & 0 & 0 & 0 & 0 \end{array} \right] \end{array}$                                                                                                                                                                          | $\begin{array}{c} 01 \\ 0 \left[ \begin{array}{c} -1 \\ 1 \\ 0 \\ 0 \\ 0 \end{array} \right] \\ 1 \\ 2 \\ 3 \\ 4 \end{array}$       | /       |
| $\mathcal{L}_q^{2+4}$                 | $\left[ \begin{array}{ccccc} 3 & -1 & -1 & -1 & 0 \\ -1 & 2 & -1 & 0 & 0 \\ -1 & -1 & 4 & -1 & -1 \\ -1 & 0 & -1 & 2 & 0 \\ 0 & 0 & -1 & 0 & 1 \end{array} \right]$                                                                                                                                            | [4]                                                                                                                                 | /       |
| $\beta_q^{2+4}$                       | 1                                                                                                                                                                                                                                                                                                              | 0                                                                                                                                   | /       |
| $\dim(\mathcal{L}_q^{2+4})$           | 5                                                                                                                                                                                                                                                                                                              | 1                                                                                                                                   | /       |
| $\text{rank}(\mathcal{L}_q^{2+4})$    | 4                                                                                                                                                                                                                                                                                                              | 1                                                                                                                                   | /       |
| $\text{nullity}(\mathcal{L}_q^{2+4})$ | 1                                                                                                                                                                                                                                                                                                              | 0                                                                                                                                   | /       |
| $\text{Spectra}(\mathcal{L}_q^{2+4})$ | {0, 1, 4, 4, 5}                                                                                                                                                                                                                                                                                                | 4                                                                                                                                   | /       |

Table 18:  $K_3 \rightarrow K_5$ 

| $q$                                   | $q = 0$                                                                                                                                                                                                                                                              | $q = 1$                                                                                                                                                                                                | $q = 2$ |
|---------------------------------------|----------------------------------------------------------------------------------------------------------------------------------------------------------------------------------------------------------------------------------------------------------------------|--------------------------------------------------------------------------------------------------------------------------------------------------------------------------------------------------------|---------|
| $\mathcal{B}_{q+1}^{3+2}$             | $\begin{array}{c} 01 \quad 12 \quad 23 \quad 03 \quad 24 \quad 02 \\ 0 \left[ \begin{array}{cccccc} -1 & 0 & 0 & -1 & 0 & -1 \\ 1 & 1 & -1 & 0 & 0 & 0 \\ 2 & 0 & 1 & -1 & 0 & -1 \\ 3 & 0 & 0 & 1 & 1 & 0 \\ 4 & 0 & 0 & 0 & 1 & 0 \end{array} \right] \end{array}$ | $\begin{array}{c} 012 \quad 023 \\ 01 \left[ \begin{array}{cc} 1 & 0 \\ 12 & 1 & 0 \\ 23 & 0 & 1 \\ 03 & 0 & -1 \end{array} \right] \end{array}$                                                       | /       |
| $\mathcal{B}_q^3$                     | $\begin{array}{c} 0 \quad 1 \quad 2 \quad 3 \quad 4 \\ [0 \quad 0 \quad 0 \quad 0 \quad 0] \end{array}$                                                                                                                                                              | $\begin{array}{c} 01 \quad 12 \quad 23 \quad 03 \\ 0 \left[ \begin{array}{cccc} -1 & 0 & 0 & -1 \\ 1 & 1 & -1 & 0 \\ 2 & 0 & 1 & -1 \\ 3 & 0 & 0 & 1 \\ 4 & 0 & 0 & 0 \end{array} \right] \end{array}$ | /       |
| $\mathcal{L}_q^{3+2}$                 | $\left[ \begin{array}{ccccc} 3 & -1 & -1 & -1 & 0 \\ -1 & 2 & -1 & 0 & 0 \\ -1 & -1 & 4 & -1 & -1 \\ -1 & 0 & -1 & 2 & 0 \\ 0 & 0 & -1 & 0 & 1 \end{array} \right]$                                                                                                  | $\left[ \begin{array}{cccc} 3 & 0 & 0 & 1 \\ 0 & 3 & -1 & 0 \\ 0 & -1 & 3 & 0 \\ 1 & 0 & 0 & 3 \end{array} \right]$                                                                                    | /       |
| $\beta_q^{3+2}$                       | 1                                                                                                                                                                                                                                                                    | 0                                                                                                                                                                                                      | /       |
| $\dim(\mathcal{L}_q^{3+2})$           | 5                                                                                                                                                                                                                                                                    | 4                                                                                                                                                                                                      | /       |
| $\text{rank}(\mathcal{L}_q^{3+2})$    | 4                                                                                                                                                                                                                                                                    | 4                                                                                                                                                                                                      | /       |
| $\text{nullity}(\mathcal{L}_q^{3+2})$ | 1                                                                                                                                                                                                                                                                    | 0                                                                                                                                                                                                      | /       |
| $\text{Spectra}(\mathcal{L}_q^{3+2})$ | {0, 1, 2, 4, 5}                                                                                                                                                                                                                                                      | {2, 2, 4, 4}                                                                                                                                                                                           | /       |

Table 19:  $K_3 \rightarrow K_6$ 

| $q$                                   | $q = 0$                                                                                                                                                                                                                                                                                                                                                                                                                                                                                                 | $q = 1$                                                                                                                                                                                                                                                                                                                                                                                                       | $q = 2$ |
|---------------------------------------|---------------------------------------------------------------------------------------------------------------------------------------------------------------------------------------------------------------------------------------------------------------------------------------------------------------------------------------------------------------------------------------------------------------------------------------------------------------------------------------------------------|---------------------------------------------------------------------------------------------------------------------------------------------------------------------------------------------------------------------------------------------------------------------------------------------------------------------------------------------------------------------------------------------------------------|---------|
| $\mathcal{B}_{q+1}^{3+3}$             | $\begin{array}{cccccc} & 01 & 12 & 23 & 03 & 24 & 02 & 13 \\ 0 & \left[ \begin{array}{cccccc} -1 & 0 & 0 & -1 & 0 & -1 & 0 \end{array} \right] \\ 1 & \left[ \begin{array}{cccccc} 1 & -1 & 0 & 0 & 0 & 0 & -1 \end{array} \right] \\ 2 & \left[ \begin{array}{cccccc} 0 & 1 & -1 & 0 & -1 & 1 & 0 \end{array} \right] \\ 3 & \left[ \begin{array}{cccccc} 0 & 0 & 1 & 1 & 0 & 0 & 1 \end{array} \right] \\ 4 & \left[ \begin{array}{cccccc} 0 & 0 & 0 & 0 & 1 & 0 & 0 \end{array} \right] \end{array}$ | $\begin{array}{cccc} & 012 & 023 & 013 & 123 \\ 01 & \left[ \begin{array}{cccc} 1 & 0 & 1 & 0 \end{array} \right] \\ 12 & \left[ \begin{array}{cccc} 1 & 0 & 0 & 1 \end{array} \right] \\ 23 & \left[ \begin{array}{cccc} 0 & 1 & 0 & 1 \end{array} \right] \\ 03 & \left[ \begin{array}{cccc} 0 & -1 & -1 & 0 \end{array} \right] \end{array}$                                                               | /       |
| $\mathcal{B}_q^3$                     | $\begin{array}{cccccc} & 0 & 1 & 2 & 3 & 4 \\ & [ 0 & 0 & 0 & 0 & 0 ] \end{array}$                                                                                                                                                                                                                                                                                                                                                                                                                      | $\begin{array}{cccc} & 01 & 12 & 23 & 03 \\ 0 & \left[ \begin{array}{cccc} -1 & 0 & 0 & -1 \end{array} \right] \\ 1 & \left[ \begin{array}{cccc} 1 & -1 & 0 & 0 \end{array} \right] \\ 2 & \left[ \begin{array}{cccc} 0 & 1 & -1 & 0 \end{array} \right] \\ 3 & \left[ \begin{array}{cccc} 0 & 0 & 1 & 1 \end{array} \right] \\ 4 & \left[ \begin{array}{cccc} 0 & 0 & 0 & 0 \end{array} \right] \end{array}$ | /       |
| $\mathcal{L}_q^{3+3}$                 | $\left[ \begin{array}{ccccc} 3 & -1 & -1 & -1 & 0 \\ -1 & 3 & -1 & -1 & 0 \\ -1 & -1 & 4 & -1 & -1 \\ -1 & -1 & -1 & 3 & 0 \\ 0 & 0 & -1 & 0 & 1 \end{array} \right]$                                                                                                                                                                                                                                                                                                                                   | $\left[ \begin{array}{cccc} 4 & 0 & 0 & 0 \\ 0 & 4 & 0 & 0 \\ 0 & 0 & 4 & 0 \\ 0 & 0 & 0 & 4 \end{array} \right]$                                                                                                                                                                                                                                                                                             | /       |
| $\beta_q^{3+3}$                       | 1                                                                                                                                                                                                                                                                                                                                                                                                                                                                                                       | 0                                                                                                                                                                                                                                                                                                                                                                                                             | /       |
| $\dim(\mathcal{L}_q^{3+3})$           | 5                                                                                                                                                                                                                                                                                                                                                                                                                                                                                                       | 4                                                                                                                                                                                                                                                                                                                                                                                                             | /       |
| $\text{rank}(\mathcal{L}_q^{3+3})$    | 4                                                                                                                                                                                                                                                                                                                                                                                                                                                                                                       | 4                                                                                                                                                                                                                                                                                                                                                                                                             | /       |
| $\text{nullity}(\mathcal{L}_q^{3+3})$ | 1                                                                                                                                                                                                                                                                                                                                                                                                                                                                                                       | 0                                                                                                                                                                                                                                                                                                                                                                                                             | /       |
| $\text{Spectra}(\mathcal{L}_q^{3+3})$ | {0, 1, 4, 4, 5}                                                                                                                                                                                                                                                                                                                                                                                                                                                                                         | {4, 4, 4, 4}                                                                                                                                                                                                                                                                                                                                                                                                  | /       |

Table 20:  $K_4 \rightarrow K_4$ 

| $q$                                   | $q = 0$                                                                                                                                                                                                         | $q = 1$                                                                                                                                                                                                         | $q = 2$ |
|---------------------------------------|-----------------------------------------------------------------------------------------------------------------------------------------------------------------------------------------------------------------|-----------------------------------------------------------------------------------------------------------------------------------------------------------------------------------------------------------------|---------|
| $\mathcal{B}_{q+1}^{4+0}$             | $\begin{array}{c} 01 \ 12 \ 23 \ 03 \ 24 \\ 0 \begin{bmatrix} -1 & 0 & 0 & -1 & 0 \\ 1 & -1 & 0 & 0 & 0 \\ 2 & 0 & 1 & -1 & 0 & -1 \\ 3 & 0 & 0 & 1 & 1 & 0 \\ 4 & 0 & 0 & 0 & 0 & 1 \end{bmatrix} \end{array}$ | /                                                                                                                                                                                                               | /       |
| $\mathcal{B}_q^4$                     | $\begin{array}{c} 0 \ 1 \ 2 \ 3 \ 4 \\ / \begin{bmatrix} 0 & 0 & 0 & 0 & 0 \end{bmatrix} \end{array}$                                                                                                           | $\begin{array}{c} 01 \ 12 \ 23 \ 03 \ 24 \\ 0 \begin{bmatrix} -1 & 0 & 0 & -1 & 0 \\ 1 & 1 & -1 & 0 & 0 \\ 2 & 0 & 1 & -1 & 0 & -1 \\ 3 & 0 & 0 & 1 & 1 & 0 \\ 4 & 0 & 0 & 0 & 0 & 1 \end{bmatrix} \end{array}$ | /       |
| $\mathcal{L}_q^{4+0}$                 | $\begin{bmatrix} 2 & -1 & 0 & -1 & 0 \\ -1 & 2 & -1 & 0 & 0 \\ 0 & -1 & 3 & -1 & -1 \\ -1 & 0 & -1 & 2 & 0 \\ 0 & 0 & -1 & 0 & 1 \end{bmatrix}$                                                                 | $\begin{bmatrix} 2 & -1 & 0 & 1 & 0 \\ -1 & 2 & -1 & 0 & -1 \\ 0 & -1 & 2 & 1 & 1 \\ 1 & 0 & 1 & 2 & 0 \\ 0 & -1 & 1 & 0 & 2 \end{bmatrix}$                                                                     | /       |
| $\beta_q^{4+0}$                       | 1                                                                                                                                                                                                               | 1                                                                                                                                                                                                               | /       |
| $\dim(\mathcal{L}_q^{4+0})$           | 5                                                                                                                                                                                                               | 5                                                                                                                                                                                                               | /       |
| $\text{rank}(\mathcal{L}_q^{4+0})$    | 4                                                                                                                                                                                                               | 4                                                                                                                                                                                                               | /       |
| $\text{nullity}(\mathcal{L}_q^{4+0})$ | 1                                                                                                                                                                                                               | 1                                                                                                                                                                                                               | /       |
| $\text{Spectra}(\mathcal{L}_q^{4+0})$ | {0, 0.8299, 2, 2.6889, 4.4812}                                                                                                                                                                                  | {0, 0.8299, 2, 2.6889, 4.4812}                                                                                                                                                                                  | /       |



Table 21:  $K_4 \rightarrow K_5$ 

| $q$                                   | $q = 0$                                                                                                                                                                                                                                                                                                                                                         | $q = 1$                                                                                                                                                                                                                                                                                                                               | $q = 2$ |
|---------------------------------------|-----------------------------------------------------------------------------------------------------------------------------------------------------------------------------------------------------------------------------------------------------------------------------------------------------------------------------------------------------------------|---------------------------------------------------------------------------------------------------------------------------------------------------------------------------------------------------------------------------------------------------------------------------------------------------------------------------------------|---------|
| $\mathcal{B}_{q+1}^{4+1}$             | $ \begin{array}{c} 01 \ 12 \ 23 \ 03 \ 24 \ 02 \\ 0 \begin{bmatrix} -1 & 0 & 0 & -1 & 0 & -1 \end{bmatrix} \\ 1 \begin{bmatrix} 1 & -1 & 0 & 0 & 0 & 0 \end{bmatrix} \\ 2 \begin{bmatrix} 0 & 1 & -1 & 0 & -1 & 1 \end{bmatrix} \\ 3 \begin{bmatrix} 0 & 0 & 1 & 1 & 0 & 0 \end{bmatrix} \\ 4 \begin{bmatrix} 0 & 0 & 0 & 0 & 1 & 0 \end{bmatrix} \end{array} $ | $ \begin{array}{c} 012 \ 023 \\ 01 \begin{bmatrix} 1 & 0 \end{bmatrix} \\ 12 \begin{bmatrix} 1 & 0 \end{bmatrix} \\ 23 \begin{bmatrix} 0 & 1 \end{bmatrix} \\ 03 \begin{bmatrix} 0 & -1 \end{bmatrix} \\ 24 \begin{bmatrix} 0 & 0 \end{bmatrix} \end{array} $                                                                         | /       |
| $\mathcal{B}_q^4$                     | $ \begin{array}{c} 0 \ 1 \ 2 \ 3 \ 4 \\ / \begin{bmatrix} 0 & 0 & 0 & 0 & 0 \end{bmatrix} \end{array} $                                                                                                                                                                                                                                                         | $ \begin{array}{c} 01 \ 12 \ 23 \ 03 \ 24 \\ 0 \begin{bmatrix} -1 & 0 & 0 & -1 & 0 \end{bmatrix} \\ 1 \begin{bmatrix} 1 & -1 & 0 & 0 & 0 \end{bmatrix} \\ 2 \begin{bmatrix} 0 & 1 & -1 & 0 & -1 \end{bmatrix} \\ 3 \begin{bmatrix} 0 & 0 & 1 & 1 & 0 \end{bmatrix} \\ 4 \begin{bmatrix} 0 & 0 & 0 & 0 & 1 \end{bmatrix} \end{array} $ | /       |
| $\mathcal{L}_q^{4+1}$                 | $ \begin{bmatrix} 3 & -1 & -1 & -1 & 0 \\ -1 & 2 & -1 & 0 & 0 \\ -1 & -1 & 4 & -1 & -1 \\ -1 & 0 & -1 & 2 & 0 \\ 0 & 0 & -1 & 0 & 1 \end{bmatrix} $                                                                                                                                                                                                             | $ \begin{bmatrix} 3 & 0 & 0 & 1 & 0 \\ 0 & 3 & -1 & 0 & -1 \\ 0 & -1 & 3 & 0 & 1 \\ 1 & 0 & 0 & 3 & 0 \\ 0 & -1 & 1 & 0 & 2 \end{bmatrix} $                                                                                                                                                                                           | /       |
| $\beta_q^{4+1}$                       | 1                                                                                                                                                                                                                                                                                                                                                               | 0                                                                                                                                                                                                                                                                                                                                     | /       |
| $\dim(\mathcal{L}_q^{4+1})$           | 5                                                                                                                                                                                                                                                                                                                                                               | 5                                                                                                                                                                                                                                                                                                                                     | /       |
| $\text{rank}(\mathcal{L}_q^{4+1})$    | 4                                                                                                                                                                                                                                                                                                                                                               | 5                                                                                                                                                                                                                                                                                                                                     | /       |
| $\text{nullity}(\mathcal{L}_q^{4+1})$ | 1                                                                                                                                                                                                                                                                                                                                                               | 0                                                                                                                                                                                                                                                                                                                                     | /       |
| $\text{Spectra}(\mathcal{L}_q^{4+1})$ | {0, 1, 2, 4, 5}                                                                                                                                                                                                                                                                                                                                                 | {1.2677, 2, 2, 4, 4.7321}                                                                                                                                                                                                                                                                                                             | /       |

Table 22:  $K_4 \rightarrow K_6$ 

| $q$                                   | $q = 0$                                                                                                                                                                                                                                                                                | $q = 1$                                                                                                                                                                                                                               | $q = 2$ |
|---------------------------------------|----------------------------------------------------------------------------------------------------------------------------------------------------------------------------------------------------------------------------------------------------------------------------------------|---------------------------------------------------------------------------------------------------------------------------------------------------------------------------------------------------------------------------------------|---------|
| $\mathcal{B}_{q+1}^{4+2}$             | $\begin{array}{c} 01 \ 12 \ 23 \ 03 \ 24 \ 02 \ 13 \\ 0 \left[ \begin{array}{cccccc} -1 & 0 & 0 & -1 & 0 & -1 & 0 \\ 1 & 1 & -1 & 0 & 0 & 0 & -1 \\ 2 & 0 & 1 & -1 & 0 & -1 & 1 & 0 \\ 3 & 0 & 0 & 1 & 1 & 0 & 0 & 1 \\ 4 & 0 & 0 & 0 & 0 & 1 & 0 & 0 \end{array} \right] \end{array}$ | $\begin{array}{c} 012 \ 023 \ 013 \ 123 \\ 01 \left[ \begin{array}{cccc} 1 & 0 & 1 & 0 \\ 12 & 1 & 0 & 0 & 1 \\ 23 & 0 & 1 & 0 & 1 \\ 03 & 0 & -1 & -1 & 0 \\ 24 & 0 & 0 & 0 & 0 \end{array} \right] \end{array}$                     | /       |
| $\mathcal{B}_q^4$                     | $\begin{array}{c} 0 \ 1 \ 2 \ 3 \ 4 \\ [ 0 \ 0 \ 0 \ 0 \ 0 ] \end{array}$                                                                                                                                                                                                              | $\begin{array}{c} 01 \ 12 \ 23 \ 03 \ 24 \\ 0 \left[ \begin{array}{ccccc} -1 & 0 & 0 & -1 & 0 \\ 1 & 1 & -1 & 0 & 0 & 0 \\ 2 & 0 & 1 & -1 & 0 & -1 \\ 3 & 0 & 0 & 1 & 1 & 0 \\ 4 & 0 & 0 & 0 & 0 & 1 \end{array} \right] \end{array}$ | /       |
| $\mathcal{L}_q^{4+2}$                 | $\left[ \begin{array}{ccccc} 3 & -1 & -1 & -1 & 0 \\ -1 & 3 & -1 & -1 & 0 \\ -1 & -1 & 4 & -1 & -1 \\ -1 & -1 & -1 & 3 & 0 \\ 0 & 0 & -1 & 0 & 1 \end{array} \right]$                                                                                                                  | $\left[ \begin{array}{ccccc} 4 & 0 & 0 & 0 & 0 \\ 0 & 4 & 0 & 0 & -1 \\ 0 & 0 & 4 & 0 & 1 \\ 0 & 0 & 0 & 4 & 0 \\ 0 & -1 & 1 & 0 & 2 \end{array} \right]$                                                                             | /       |
| $\beta_q^{4+2}$                       | 1                                                                                                                                                                                                                                                                                      | 0                                                                                                                                                                                                                                     | /       |
| $\dim(\mathcal{L}_q^{4+2})$           | 5                                                                                                                                                                                                                                                                                      | 5                                                                                                                                                                                                                                     | /       |
| $\text{rank}(\mathcal{L}_q^{4+2})$    | 4                                                                                                                                                                                                                                                                                      | 5                                                                                                                                                                                                                                     | /       |
| $\text{nullity}(\mathcal{L}_q^{4+2})$ | 1                                                                                                                                                                                                                                                                                      | 0                                                                                                                                                                                                                                     | /       |
| $\text{Spectra}(\mathcal{L}_q^{4+2})$ | {0, 1, 4, 4, 5}                                                                                                                                                                                                                                                                        | {1.2679, 4, 4, 4, 4.7321}                                                                                                                                                                                                             | /       |

Table 23:  $K_5 \rightarrow K_6$ 

| $q$                                   | $q = 0$                                                                                                                                                                                                                                                                                                                                                                  | $q = 1$                                                                                                                                                                                                                                                                                                                                                                          | $q = 2$                                                                                                                                                                                                                                                                                                             |
|---------------------------------------|--------------------------------------------------------------------------------------------------------------------------------------------------------------------------------------------------------------------------------------------------------------------------------------------------------------------------------------------------------------------------|----------------------------------------------------------------------------------------------------------------------------------------------------------------------------------------------------------------------------------------------------------------------------------------------------------------------------------------------------------------------------------|---------------------------------------------------------------------------------------------------------------------------------------------------------------------------------------------------------------------------------------------------------------------------------------------------------------------|
| $\mathcal{B}_{q+1}^{5+1}$             | $\begin{matrix} & 01 & 12 & 23 & 03 & 24 & 02 \\ 0 & \begin{bmatrix} -1 & 0 & 0 & -1 & 0 & -1 \end{bmatrix} \\ 1 & \begin{bmatrix} 1 & -1 & 0 & 0 & 0 & 0 \end{bmatrix} \\ 2 & \begin{bmatrix} 0 & 1 & -1 & 0 & -1 & 1 \end{bmatrix} \\ 3 & \begin{bmatrix} 0 & 0 & 1 & 1 & 0 & 0 \end{bmatrix} \\ 4 & \begin{bmatrix} 0 & 0 & 0 & 0 & 1 & 0 \end{bmatrix} \end{matrix}$ | $\begin{matrix} & 012 & 023 & 013 & 123 \\ 01 & \begin{bmatrix} 1 & 0 & 1 & 0 \end{bmatrix} \\ 12 & \begin{bmatrix} 1 & 0 & 0 & 1 \end{bmatrix} \\ 23 & \begin{bmatrix} 0 & 1 & 0 & 1 \end{bmatrix} \\ 03 & \begin{bmatrix} 0 & -1 & -1 & 0 \end{bmatrix} \\ 24 & \begin{bmatrix} 0 & 0 & 0 & 0 \end{bmatrix} \\ 02 & \begin{bmatrix} -1 & 1 & 0 & 0 \end{bmatrix} \end{matrix}$ | /                                                                                                                                                                                                                                                                                                                   |
| $\mathcal{B}_q^5$                     | $\begin{matrix} & 0 & 1 & 2 & 3 & 4 \\ / & \begin{bmatrix} 0 & 0 & 0 & 0 & 0 \end{bmatrix} \end{matrix}$                                                                                                                                                                                                                                                                 | $\begin{matrix} & 01 & 12 & 23 & 03 & 24 & 02 \\ 0 & \begin{bmatrix} -1 & 0 & 0 & -1 & 0 & -1 \end{bmatrix} \\ 1 & \begin{bmatrix} 1 & -1 & 0 & 0 & 0 & 0 \end{bmatrix} \\ 2 & \begin{bmatrix} 0 & 1 & -1 & 0 & -1 & 1 \end{bmatrix} \\ 3 & \begin{bmatrix} 0 & 0 & 1 & 1 & 0 & 0 \end{bmatrix} \\ 4 & \begin{bmatrix} 0 & 0 & 0 & 0 & 1 & 0 \end{bmatrix} \end{matrix}$         | $\begin{matrix} & 012 & 023 \\ 01 & \begin{bmatrix} 1 & 0 \end{bmatrix} \\ 12 & \begin{bmatrix} 1 & 0 \end{bmatrix} \\ 23 & \begin{bmatrix} 0 & 1 \end{bmatrix} \\ 03 & \begin{bmatrix} 0 & -1 \end{bmatrix} \\ 24 & \begin{bmatrix} 0 & 0 \end{bmatrix} \\ 02 & \begin{bmatrix} -1 & 1 \end{bmatrix} \end{matrix}$ |
| $\mathcal{L}_q^{5+1}$                 | $\begin{bmatrix} 3 & -1 & -1 & -1 & 0 \\ -1 & 2 & -1 & 0 & 0 \\ -1 & -1 & 4 & -1 & -1 \\ -1 & 0 & -1 & 2 & 0 \\ 0 & 0 & -1 & 0 & 1 \end{bmatrix}$                                                                                                                                                                                                                        | $\begin{bmatrix} 4 & 0 & 0 & 0 & 0 & 0 \\ 0 & 4 & 0 & 0 & -1 & 0 \\ 0 & 0 & 4 & 0 & 1 & 0 \\ 0 & 0 & 0 & 4 & 0 & 0 \\ 0 & -1 & 1 & 0 & 2 & -1 \\ 0 & 0 & 0 & 0 & -1 & 4 \end{bmatrix}$                                                                                                                                                                                           | $\begin{bmatrix} 3 & -1 \\ -1 & 3 \end{bmatrix}$                                                                                                                                                                                                                                                                    |
| $\beta_q^{5+1}$                       | 1                                                                                                                                                                                                                                                                                                                                                                        | 0                                                                                                                                                                                                                                                                                                                                                                                | 0                                                                                                                                                                                                                                                                                                                   |
| $\dim(\mathcal{L}_q^{5+1})$           | 5                                                                                                                                                                                                                                                                                                                                                                        | 6                                                                                                                                                                                                                                                                                                                                                                                | 2                                                                                                                                                                                                                                                                                                                   |
| $\text{rank}(\mathcal{L}_q^{5+1})$    | 4                                                                                                                                                                                                                                                                                                                                                                        | 6                                                                                                                                                                                                                                                                                                                                                                                | 2                                                                                                                                                                                                                                                                                                                   |
| $\text{nullity}(\mathcal{L}_q^{5+1})$ | 1                                                                                                                                                                                                                                                                                                                                                                        | 0                                                                                                                                                                                                                                                                                                                                                                                | 0                                                                                                                                                                                                                                                                                                                   |
| $\text{Spectra}(\mathcal{L}_q^{5+1})$ | {0, 1, 2, 4, 5}                                                                                                                                                                                                                                                                                                                                                          | {1, 4, 4, 4, 4, 5}                                                                                                                                                                                                                                                                                                                                                               | {2, 4}                                                                                                                                                                                                                                                                                                              |

## References

- [1] Allen Hatcher. Algebraic topology. *Journal of Chemical Information and Modeling*, 53(9):1689–1699, 2013.
- [2] H. Edelsbrunner and J. Harer. *Computational topology: an introduction*. American Mathematical Soc., 2010.
- [3] C. Hofer, R. Kwitt, M. Niethammer, and A. Uhl. Deep learning with topological signatures. In *Advances in Neural Information Processing Systems*, pages 1634–1644, 2017.
